# Supplementary material for: Phylogenetically diverse group of native bacterial symbionts isolated from root nodules of groundnut (Arachis hypogaea L.) in South Africa
Source: PubMed Central journal article supplement (PMC5460907; doi:10.1016/j.syapm.2017.02.002), 2017-06
Supplement: mmc1.pdf [file mmc1.pdf]

**Phylogenetically diverse group of bacterial symbionts isolated from root nodules of groundnut (*Arachis hypogaea*) in South Africa**

<sup>1</sup>Sanjay K Jaiswal, <sup>2</sup>Levini A Msimbira, <sup>1</sup>Felix D Dakora

<sup>1</sup>Department of chemistry, <sup>2</sup>Department of crop Sciences, Tshwane University of Technology, Pretoria, South Africa

**Table S1**

Primers and PCR temperature profiles used for DNA amplification.

| Gene name                                | Primer Sequence (5' – 3')                                                  | Temperature profile                                                                                                        | References |
|------------------------------------------|----------------------------------------------------------------------------|----------------------------------------------------------------------------------------------------------------------------|------------|
| 16S rDNA                                 | fD1 (9-29)AGAGTTTGATCCTGGCTCAG<br>rD1 (1474-1494)CTTAAGGAGGTGATCCAGCC      | 5 min 95°C, 35 X (1 min 95 °C, 1 min 55 °C, 1 min 72°C), 10 min 72                                                         | [52]       |
| IGS (16S-23S rDNA)                       | FGPS1490-72 TGCGGCTGGATCACCTCCTT<br>FGPL132-38 CCGGGTTTCCCCATTTCGG         | 5 min 95°C, 35 X (1 min 95 °C, 1 min 55 °C, 1 min 72°C), 10 min 72 °C                                                      | [2]        |
| <i>gltA</i>                              | CSGCCTTCTAYCAYGACTC<br>GGGAGCCSAKCGCCTTCAG                                 | 5 min 94°C, 20 X [30 s 94°C, 30 s 63°C (-0.5°C/cycle), 90s 72°C], 25 X (30 s 94°C, 30 s 54.5 °C, 90s 72°C), 10 min 72 °C   | [29]       |
| <i>glnII</i>                             | 13f-AAGCTCGAGTACATCTGGCTCGACGG<br>681r-SGAGCCGTTCCAGTCGGTGGTGTCG           | 2 min 95°C, 35 X (45 s 95 °C, 30 s 65 °C, 90 s 72°C), 10 min 72 °C                                                         | [42]       |
| <i>gyrB</i>                              | 343f-TTCGACCAGAAATCCTAYAAAGG<br>1043r-AGCTTGTCCTTSGTCTGCG                  | 10 min 95°C, 35 X (30 s 94°C, 30 s 58 °C, 1 min 72°C), 10 min 72 °C                                                        | [27]       |
| <i>atpD</i>                              | 189f- TCTGGTCCGYGGCCAGGAAG<br>804r-CGACACTTCCGARCCSGCCTG                   | 2 min 95°C, 35 X (45 s 95 °C, 30 s 65 °C, 90 s 72°C), 10 min 72 °C                                                         | [42]       |
| <i>nifH</i>                              | 28f-TACGGNAARGGSGGNATCGGCAA<br>809r-AGCATGTCYTCSAGYYTCNTCCA                | 5 min 94°C, 20 X [30 s 94°C, 30 s 65°C (-0.5 °C / cycle), 90 s 72°C], 25 X (30 s 94°C, 30 s 65°C, 90 s 72°C), 10 min 72 °C | [35]       |
| <i>nodC1</i><br><i>nodCp8</i>            | 5'GTC GAT TGC MRG TCA AGA CTA CG 3'<br>5'GCC AGG TCT IGT TGC GAT TGC TC 3' | 30 s 94°C, 40 X [30s 94°C, 1 min 57°C, 30s 72°C], 5 min 72°C                                                               | [43]       |
| <i>nodCf<sub>n</sub></i><br><i>nodC1</i> | 5'AGGTGGTYGAYGACGGTTC3'<br>5'CGYGACAGCCANTCKCTATTG3'                       | 30 s 94°C, 40 X [30s 94°C, 1 min 55.4°C, 30s 72°C], 5 min 72°C                                                             | [25]       |

**Table S2**

Accession numbers of the gene sequences of the soybean nodulating isolates used for the phylogenetic study

| Strain    | IGS      | 16S rDNA | <i>atpD</i> | <i>glnII</i> | <i>gyrB</i> | <i>gltA</i> | <i>nifH</i> |
|-----------|----------|----------|-------------|--------------|-------------|-------------|-------------|
| TUTAHS27  | KT124648 | KY463514 | KT163022    | KT163032     | KX348514    |             | KT729536    |
| TUTAHS45  | KT124649 | KY463501 |             | KT163050     | KX348509    | KX425000    | KT729530    |
| TUTAHS31  | KT124650 | KY463507 | KT163023    | KT163048     | KX348505    | KX424994    | KT729528    |
| TUTAHS114 | KT124651 | KY463509 |             | KT163052     | KX348508    | KX425001    |             |
| TUTAHS10  | KT124652 | KY463512 |             | KT163039     | KX348511    | KX424997    | KT729533    |
| TUTAHS67  | KT124654 | KY463503 | KY474573    | KT163034     | KX348519    | KX425005    | KT729542    |
| TUTAHS75  | KT124655 | KY463518 | KT163026    | KT163035     | KX348517    | KX425006    | KT729540    |
| TUTAHS40  | KT124656 | KY463509 | KT163030    |              | KX348518    |             | KT729541    |
| TUTAHS140 | KT124657 | KY463506 | KT163028    |              | KX348522    | KX425003    |             |
| TUTAHS80  | KT124658 | KY463508 |             | KT163036     | KX348507    | KX425002    | KT729529    |
| TUTAHS51  | KT124659 |          | KT163029    | KT163038     | KX348504    |             |             |
| TUTAHS115 | KT124660 | KY463504 | KT163027    | KT163037     | KX348520    |             | KT729543    |
| TUTAHS4   | KT124661 |          |             | KT163040     | KX348513    | KX424993    | KT729535    |
| TUTAHS7   | KT124662 | KY463513 | KT163031    | KT163046     | KX348521    | KX425004    | KT729544    |
| TUTAHS41  | KT124663 | KY463511 |             | KT163049     |             | KX424998    | KT729532    |
| TUTAHS57  | KT124664 | KY463515 |             | KT163042     | KX348515    | KX425007    | KT729537    |
| TUTAHS87  | KT124665 | KY463502 |             | KT163044     | KX348510    | KX424999    |             |
| TUTAHS144 | KT124666 | KY463517 | KT163024    | KT163051     |             |             | KT729539    |
| TUTAHS150 | KT124667 | KY463516 |             |              | KX348516    |             | KT729538    |
| TUTAHS17  |          |          |             | KT163041     |             |             |             |
| TUTAHS118 |          |          |             | KT163045     |             | KX424995    | KT729527    |
| TUTAHS126 |          |          |             | KT163047     |             |             | KT428748    |
| TUTAHS110 | KY513720 |          |             | KT163053     |             |             |             |

**Table S3**

Information of nucleotide sequences used for phylogenetic analysis

| Locus                             | No. of strains<br>used for tree<br>construction | Nucleotide sequence information |               |                                |               | Total* | Frequency<br>T/C/A/G (%) |
|-----------------------------------|-------------------------------------------------|---------------------------------|---------------|--------------------------------|---------------|--------|--------------------------|
|                                   |                                                 | Conserved (C)                   | Variables (V) | Parsimony-<br>informative (Pi) | Singleton (S) |        |                          |
| 16S rDNA<br><i>Bradyrhizobium</i> | 49                                              | 911(82.1)                       | 194(17.5)     | 71(6.4)                        | 123(11.1)     | 1110   | 20.4/23.5/24.8/31.2      |
| 16S rDNA <i>Rhizobium</i>         | 62                                              | 670 (81.2)                      | 155 (18.8)    | 89 (10.8)                      | 66 (8.0)      | 825    | 20.4/21.7/26.1/31.7      |
| ITS <i>Bradyrhizobium</i>         | 43                                              | 397(33.0)                       | 759(63.0)     | 401(33.3)                      | 353(29.3)     | 1204   | 24.6/26.5/17.0/31.9      |
| ITS <i>Rhizobium</i>              | 25                                              | 212 (18.8)                      | 864 (76.7)    | 633 (56.2)                     | 216 (19.2)    | 1127   | 24.8/23.9/20.7/30.6      |
| <i>atpD</i>                       | 45                                              | 242 (65.6)                      | 127 (34.4)    | 73 (19.8)                      | 54 (14.6)     | 369    | 19.9/31.1/15.7/33.3      |
| <i>glnII</i>                      | 97                                              | 233 (54.9)                      | 191 (45.0)    | 163 (38.4)                     | 28 (6.6)      | 424    | 20.2/29.8/16.8/33.2      |
| <i>gltA</i>                       | 33                                              | 146 (64.6)                      | 80 (35.4)     | 56 (24.8)                      | 24 (10.6)     | 226    | 21.7/36.1/15.3/27.0      |
| <i>gyrB</i>                       | 77                                              | 209 (37.3)                      | 352 (62.7)    | 314 (56.0)                     | 38 (6.7)      | 561    | 21.7/30.0/16.8/31.5      |
| <i>atpD+glnII+ gyrB</i>           | 34                                              | 824 (60.8)                      | 525 (38.7)    | 317 (23.4)                     | 208 (15.4)    | 1355   | 20.4/30.8/15.9/32.9      |
| <i>glnII +gltA+ gyrB</i>          | 24                                              | 691 (57.1)                      | 520 (43.0)    | 409 (33.8)                     | 111 (9.1)     | 1211   | 21.6/30.5/16.7/31.1      |
| <i>nifH</i>                       | 57                                              | 111 (53.4)                      | 97 (46.6)     | 89 (43.2)                      | 08(3.4)       | 209    | 18.5/28.4/20.5/32.6      |

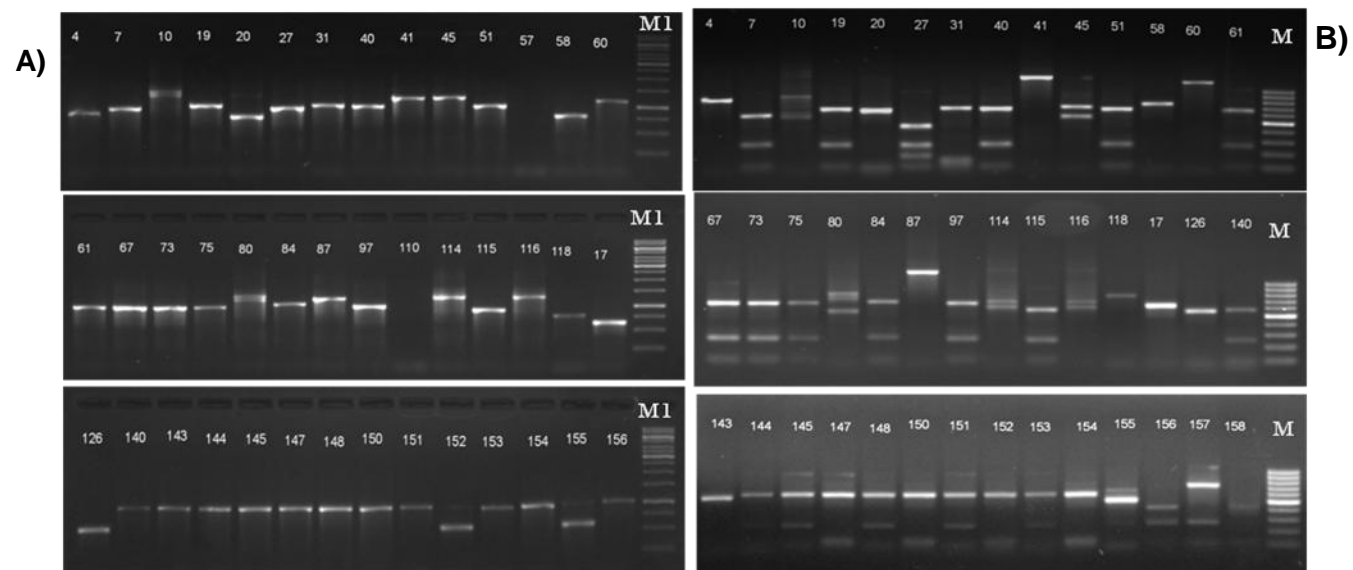

Fig. S1: A) PCR amplified B) *Hae*II digested, IGS (16S-23S rDNA) region of groundnut nodulating isolates;

M1=1kb, M=100bp

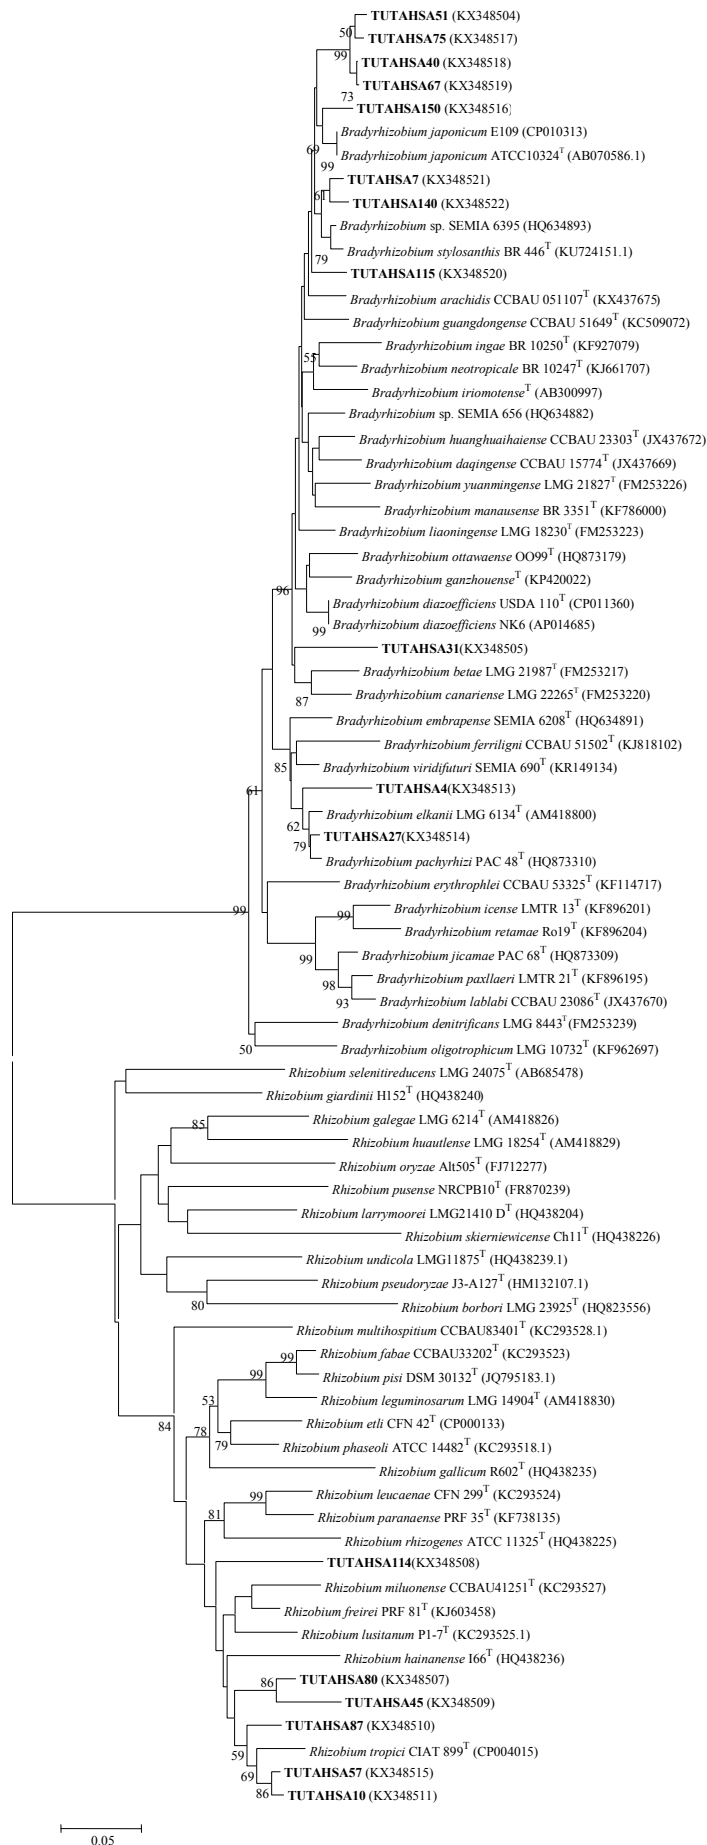

Fig. S2. The neighbour-joining phylogenetic relationships of groundnut nodulating microsymbionts based on *gyrB* sequence analysis. Groundnut nodulating microsymbionts are shown in bold with their nucleotide sequence accession numbers indicated in brackets. The  $g\ f\ i\ a$  of a hbra h d at d b a boot trap va u  $\geq 50$  are indicated for each node (1000 replicates). The scale bar represents the number of changes per nucleotide position. Phylogenetic analyses were conducted in MEGA6.

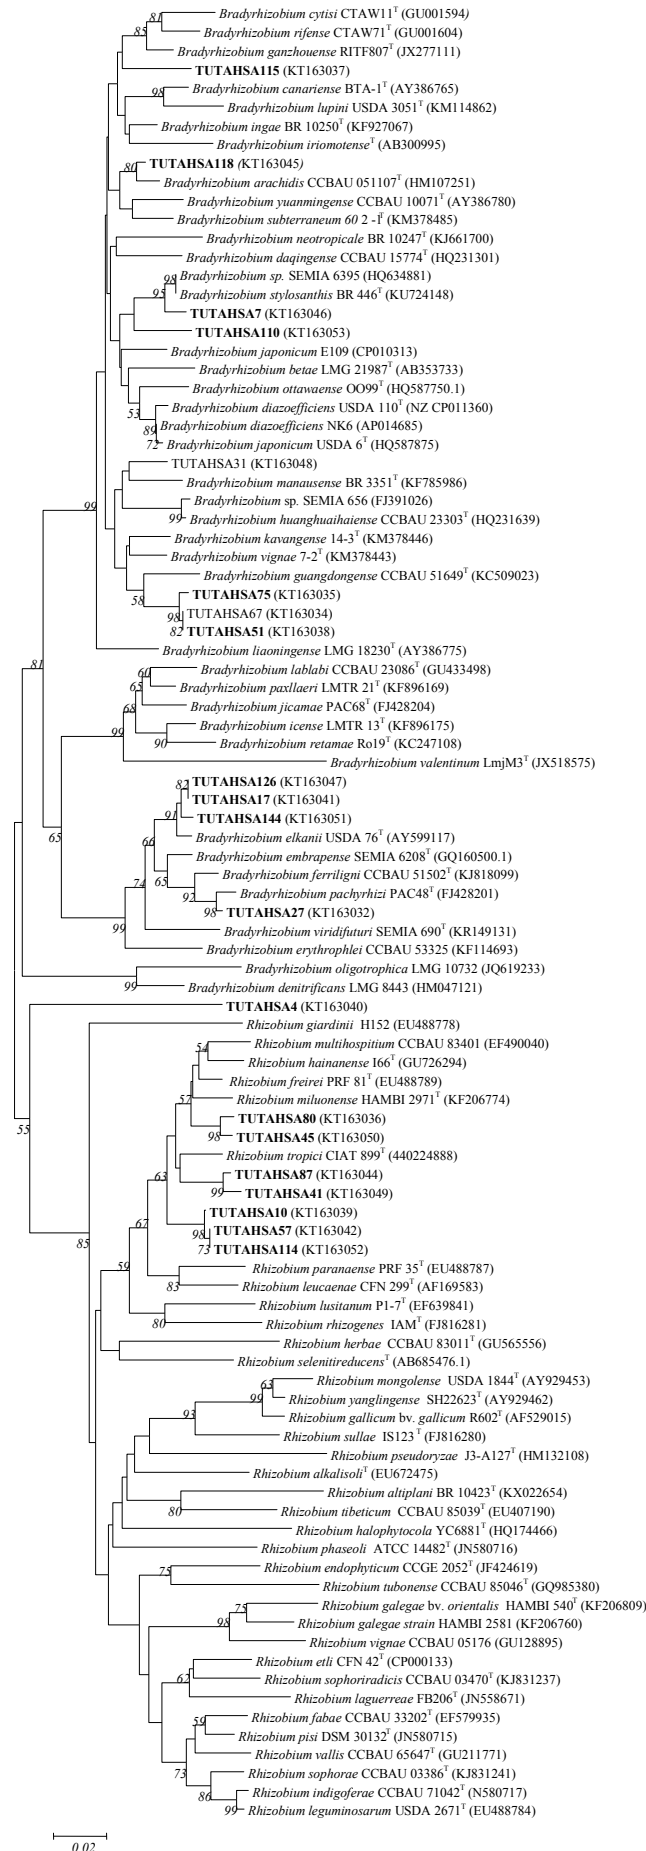

Fig. S3. The neighbour-joining phylogenetic relationships of groundnut nodulating microsymbionts based on *glnII* sequence analysis. Groundnut nodulating microsymbionts are shown in bold with their nucleotide sequence accession numbers indicated in brackets. The significance of each branch is indicated by a bootstrap value  $\geq 50$  are indicated for each node (1000 replicates). The scale bar represents the number of changes per nucleotide position. Phylogenetic analyses were conducted in MEGA6.

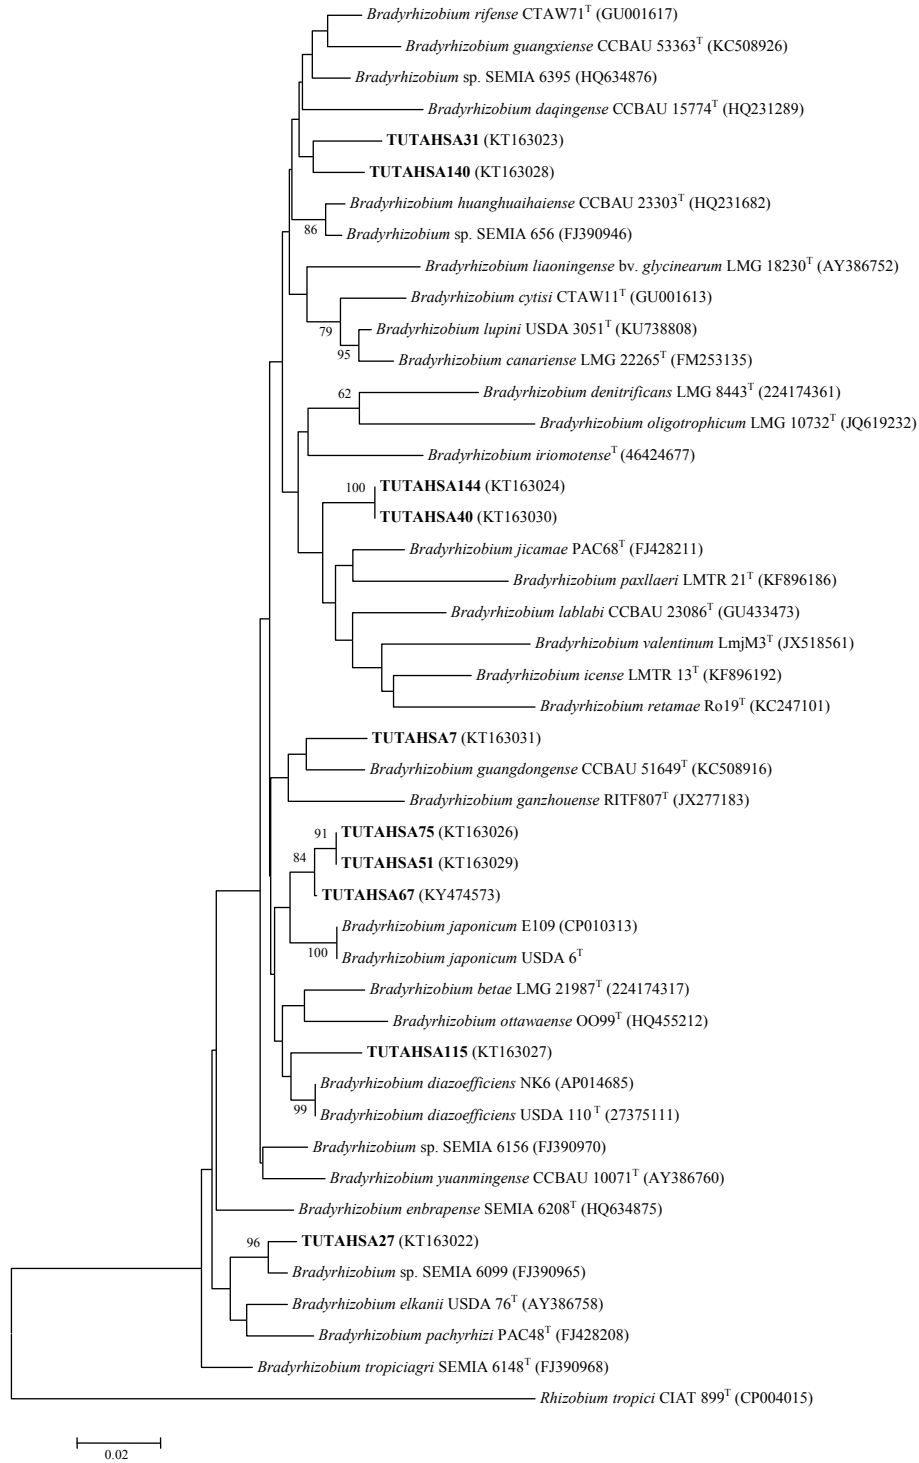

Fig. S4. The neighbour-joining phylogenetic relationships of groundnut nodulating microsymbionts based on *atpD* sequence analysis. Groundnut nodulating microsymbionts are shown in bold with their nucleotide sequence accession numbers indicated in brackets. The significance of each branch is indicated by a bootstrap value = >50 are indicated for each node (1000 replicates). The scale bar represents the number of changes per nucleotide position. Phylogenetic analyses were conducted in MEGA6.

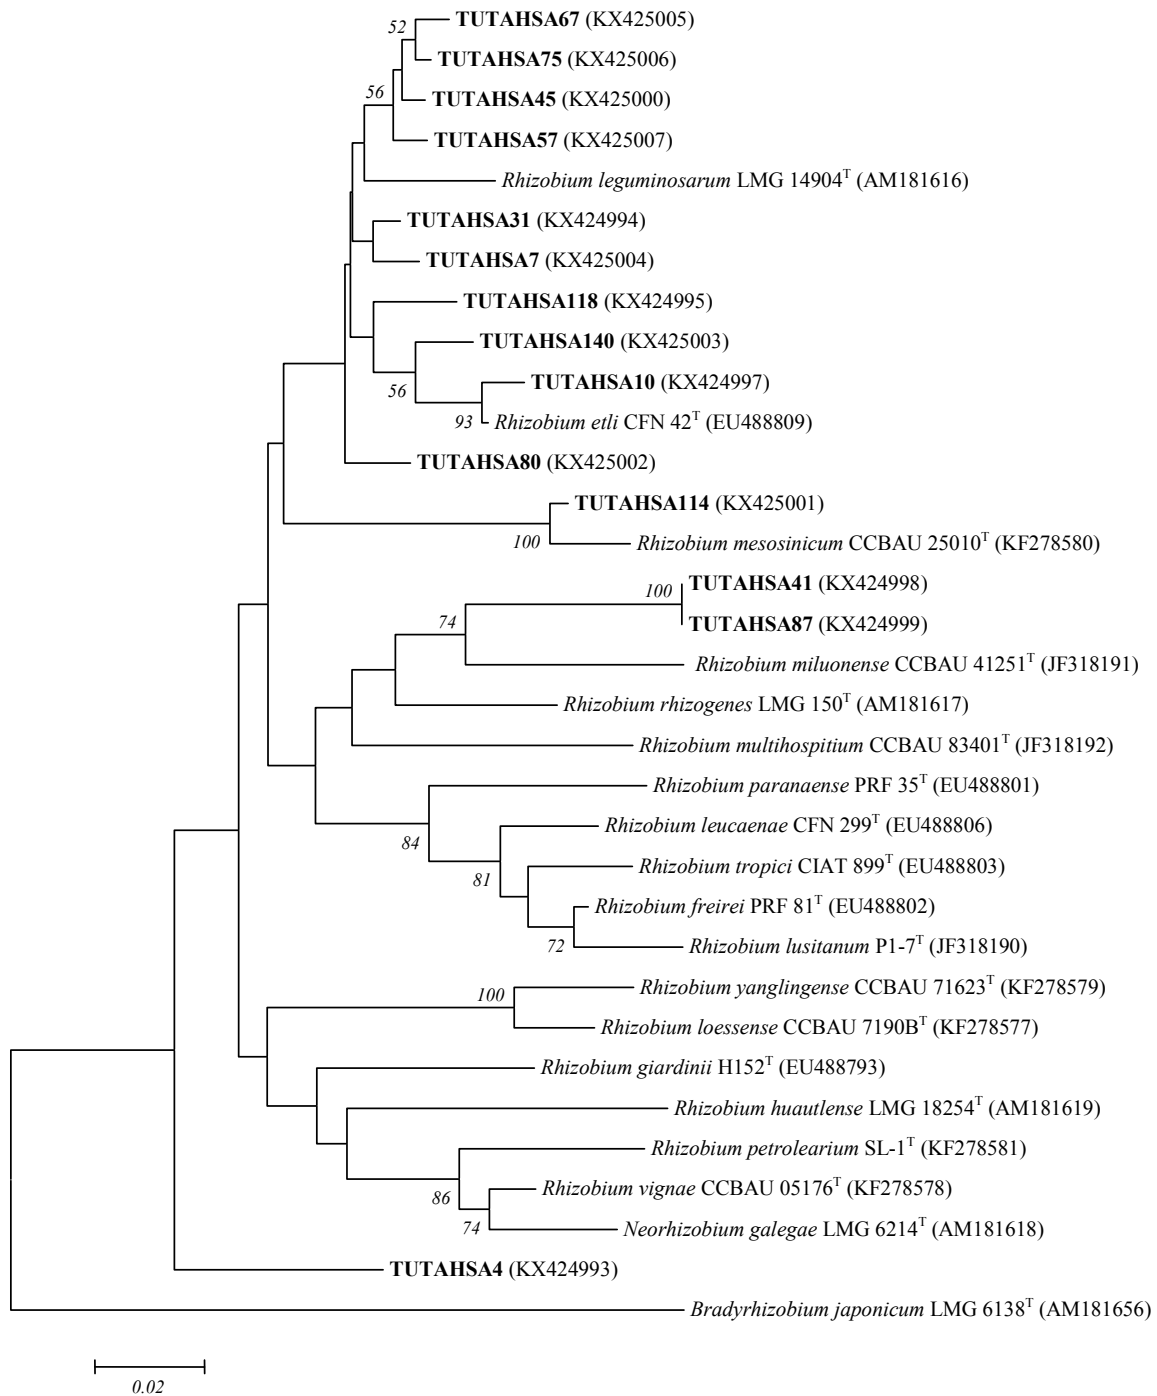

Fig. S5. The neighbour-joining phylogenetic relationships of groundnut nodulating microsymbionts based on *gltA* sequence analysis. Groundnut nodulating microsymbionts are shown in bold with their nucleotide sequence accession numbers indicated in brackets. The *g* *f* *i* *a* of a h b r a h d at d b a boot trap va u = >50 are indicated for each node (1000 replicates). The scale bar represents the number of changes per nucleotide position. Phylogenetic analyses were conducted in MEGA6.
